# Supplementary material for: Robust Recombinant Expression of Human Placental Ribonuclease Inhibitor in Insect Cells
Source: MDPI journal article supplement (doi:10.3390/biom12020273), 2022-02-08
Supplement: s1 [file s1]

**Supplementary Table S1.** Ribonuclease inhibitor yield in a set of experiments

| Exp. No. | Cell number | Yield (mg RI/10 <sup>9</sup> cells) | Yield (mg RI/liter culture) |
|----------|-------------|-------------------------------------|-----------------------------|
| 1        | 3.1E+10     | 3.3                                 | 10.3                        |
| 2        | 4.9E+10     | 4.6                                 | 17.9                        |
| 3        | 3.2E+10     | 3.1                                 | 8.7                         |
| 4        | 3.1E+10     | 5.4                                 | 16.6                        |
| 5        | 3.9E+10     | 4.6                                 | 15.8                        |
| 6        | 3.4E+10     | 3.3                                 | 11.5                        |
| 7        | 5.0E+10     | 3.3                                 | 13.5                        |
| 8        | 3.5E+10     | 5.5                                 | 18.9                        |
| 9        | 4.5E+10     | 4.2                                 | 14.8                        |
| 10       | 3.7E+10     | 3.1                                 | 11.6                        |
| 11       | 4.8E+10     | 1.7                                 | 8.3                         |
| 12       | 2.8E+10     | 3.7                                 | 10.6                        |
| 13       | 3.1E+10     | 2.1                                 | 6.5                         |
| 14       | 3.2E+10     | 4.4                                 | 14.2                        |
| 15       | 3.9E+10     | 3.3                                 | 10.7                        |
| 16       | 4.4E+10     | 2.2                                 | 7.9                         |
|          |             |                                     |                             |
| Average  | 3.8E+10     | 3.6                                 | 12.4                        |
| St. Dev. | 7.4E+09     | 1.1                                 | 3.7                         |
| CV%      | 19.5        | 30.3                                | 30.2                        |
